# Supplementary material for: The Effects of Prenatal Supplementation with β-Hydroxy-β-Methylbutyrate and/or Alpha-Ketoglutaric Acid on the Development and Maturation of Mink Intestines Are Dependent on the Number of Pregnancies and the Sex of the Offspring
Source: MDPI journal article supplement (doi:10.3390/ani11051468), 2021-05-20
Supplement: s1 [file s1]

Table S1. The effect of the main factors (type of mother – primiparous or multiparous), diet/treatment and offspring sex) and their interactions on histomorphometric parameters of the duodenum of male and female offspring born from primiparous and multiparous dams supplemented with HMB and/or AKG during the gestational period.

| <b>P value for factors and interactions</b>     | <b>Mother</b> | <b>Diet</b> | <b>Sex</b> | <b>Mother *Diet</b> | <b>Mother *Sex</b> | <b>Diet*Sex</b> | <b>Mother *Diet*Sex</b> | <b>C*HMB</b> | <b>C*AKG</b> | <b>C*HMB+AKG</b> | <b>HMB*AKG</b> | <b>HMB*HMB+AKG</b> | <b>AKG*HMB+AKG</b> |
|-------------------------------------------------|---------------|-------------|------------|---------------------|--------------------|-----------------|-------------------------|--------------|--------------|------------------|----------------|--------------------|--------------------|
| <b>Thickness of the mucosa (µm)</b>             | 0.228         | 0.235       | 0.146      | 0.000               | 0.000              | 0.000           | 0.018                   | 0.726        | 0.977        | 0.770            | 0.470          | 0.186              | 0.944              |
| <b>Thickness of the submucosa (µm)</b>          | 0.000         | 0.063       | 0.833      | 0.000               | 0.189              | 0.004           | 0.070                   | 0.648        | 0.294        | 0.040            | 0.935          | 0.445              | 0.806              |
| <b>Thickness of the inner muscle layer (µm)</b> | 0.005         | 0.000       | 0.000      | 0.116               | 0.000              | 0.001           | 0.091                   | 0.095        | 0.967        | 0.005            | 0.028          | 0.745              | 0.001              |
| <b>Thickness of the outer muscle layer (µm)</b> | 0.000         | 0.040       | 0.000      | 0.000               | 0.000              | 0.000           | 0.002                   | 0.357        | 0.599        | 0.969            | 0.021          | 0.637              | 0.325              |
| <b>Total thickness of muscularis (µm)</b>       | 0.000         | 0.025       | 0.000      | 0.000               | 0.000              | 0.000           | 0.003                   | 0.218        | 0.733        | 0.795            | 0.017          | 0.747              | 0.209              |
| <b>Muscle to mucosa ratio</b>                   | 0.316         | 0.000       | 0.000      | 0.000               | 0.000              | 0.000           | 0.000                   | 0.777        | 0.003        | 0.851            | 0.000          | 0.294              | 0.040              |
| <b>Submucosa to mucosa ratio</b>                | 0.006         | 0.806       | 0.161      | 0.000               | 0.043              | 0.001           | 0.000                   | 0.989        | 1.000        | 0.923            | 0.995          | 0.778              | 0.897              |
| <b>Total number of crypts/mm</b>                | 0.900         | 0.142       | 0.045      | 0.004               | 0.343              | 0.977           | 0.002                   | 0.319        | 0.135        | 0.841            | 0.969          | 0.815              | 0.543              |
| <b>Number of open crypts/mm</b>                 | 0.057         | 0.000       | 0.003      | 0.002               | 0.000              | 0.094           | 0.308                   | 0.488        | 0.134        | 0.322            | 0.002          | 0.992              | 0.001              |

|                                           |       |       |       |       |       |       |       |       |       |       |       |       |       |
|-------------------------------------------|-------|-------|-------|-------|-------|-------|-------|-------|-------|-------|-------|-------|-------|
| <b>Number of closed crypts/mm</b>         | 0.031 | 0.000 | 0.077 | 0.000 | 0.000 | 0.029 | 0.017 | 0.000 | 1.000 | 0.025 | 0.000 | 0.422 | 0.033 |
| <b>Number of undamaged villi/mm</b>       | 0.000 | 0.005 | 0.867 | 0.122 | 0.312 | 0.003 | 0.015 | 0.021 | 1.000 | 0.101 | 0.027 | 0.937 | 0.122 |
| <b>Number of damaged villi/mm</b>         | 0.000 | 0.004 | 0.000 | 0.010 | 0.000 | 0.000 | 0.016 | 0.218 | 0.003 | 0.015 | 0.433 | 0.711 | 0.971 |
| <b>Total number of villi/mm</b>           | 0.000 | 0.001 | 0.050 | 0.006 | 0.036 | 0.006 | 0.024 | 0.004 | 0.521 | 0.001 | 0.181 | 0.987 | 0.087 |
| <b>Number of crypts to villi/mm ratio</b> | 0.000 | 0.000 | 0.000 | 0.000 | 0.002 | 0.000 | 0.001 | 0.000 | 0.018 | 0.002 | 0.133 | 0.427 | 0.917 |
| <b>Number of enterocytes/mm</b>           | 0.001 | 0.005 | 0.062 | 0.000 | 0.060 | 0.001 | 0.982 | 0.992 | 0.964 | 0.016 | 0.870 | 0.006 | 0.062 |
| <b>Number of Goblet cells/mm</b>          | 0.632 | 0.010 | 0.000 | 0.000 | 0.392 | 0.000 | 0.000 | 0.075 | 0.812 | 0.929 | 0.005 | 0.273 | 0.440 |
| <b>Enterocytes to Goblet cells ratio</b>  | 0.186 | 0.025 | 0.010 | 0.000 | 0.828 | 0.000 | 0.039 | 0.055 | 0.997 | 0.978 | 0.031 | 0.142 | 0.930 |
| <b>The height of enterocytes (μm)</b>     | 0.119 | 0.005 | 0.000 | 0.000 | 0.867 | 0.394 | 0.009 | 0.898 | 0.004 | 0.853 | 0.036 | 1.000 | 0.049 |
| <b>Villi height (μm)</b>                  | 0.016 | 0.000 | 0.108 | 0.001 | 0.019 | 0.000 | 0.000 | 0.000 | 0.940 | 0.873 | 0.001 | 0.003 | 0.998 |
| <b>Villi width (μm)</b>                   | 0.241 | 0.461 | 0.103 | 0.000 | 0.260 | 0.307 | 0.074 | 0.397 | 0.717 | 0.891 | 0.956 | 0.829 | 0.986 |
| <b>Crypts width (μm)</b>                  | 0.481 | 0.011 | 0.001 | 0.001 | 0.244 | 0.750 | 0.050 | 0.092 | 0.934 | 0.306 | 0.018 | 0.935 | 0.092 |

|                                                            |       |       |       |       |       |       |       |       |       |       |       |       |       |       |
|------------------------------------------------------------|-------|-------|-------|-------|-------|-------|-------|-------|-------|-------|-------|-------|-------|-------|
| <b>Crypts depth<br/>(<math>\mu\text{m}</math>)</b>         | 0.000 | 0.000 | 0.000 | 0.000 | 0.000 | 0.000 | 0.000 | 0.000 | 0.125 | 0.000 | 0.000 | 0.092 | 0.000 | 0.007 |
| <b>Villus/crypt ratio</b>                                  | 0.000 | 0.000 | 0.000 | 0.000 | 0.000 | 0.101 | 0.000 | 0.000 | 0.000 | 0.236 | 0.007 | 0.085 | 0.738 | 0.538 |
| <b>Absorption<br/>surface [<math>\mu\text{m}^2</math>]</b> | 0.050 | 0.000 | 0.374 | 0.046 | 0.393 | 0.000 | 0.000 | 0.000 | 0.000 | 0.375 | 0.316 | 0.017 | 0.024 | 1.000 |

---

C, control group; HMB,  $\beta$ -Hydroxy- $\beta$ -methylbutyrate at a daily dose of 0.02 g/kg of body weight; AKG, alpha-ketoglutaric acid at a daily dose of 0.4 g/kg of body weight; N = 12 in each group; significance level at  $\alpha < 0.05$

Table S2. The effect of the main factors (type of mother – primiparous or multiparous), diet/treatment and offspring sex) and their interactions on histomorphometric parameters of the jejunum of male and female offspring born from primiparous and multiparous dams supplemented with HMB and/or AKG during the gestational period.

| <b>P value for factors and interactions</b>     | <b>Mother</b> | <b>Diet</b> | <b>Sex</b> | <b>Mother *Diet</b> | <b>Mother *Sex</b> | <b>Diet*Sex</b> | <b>Mother *Diet*Sex</b> | <b>C*HMB</b> | <b>C*AKG</b> | <b>C*HMB+AKG</b> | <b>HMB*AKG</b> | <b>HMB*HMB+AKG</b> | <b>AKG*HMB+AKG</b> |
|-------------------------------------------------|---------------|-------------|------------|---------------------|--------------------|-----------------|-------------------------|--------------|--------------|------------------|----------------|--------------------|--------------------|
| <b>Thickness of the mucosa (µm)</b>             | 0.136         | 0.000       | 0.000      | 0.000               | 0.586              | 0.038           | 0.018                   | 0.546        | 0.012        | 0.050            | 0.303          | 0.001              | 0.000              |
| <b>Thickness of the submucosa (µm)</b>          | 0.008         | 0.000       | 0.660      | 0.418               | 0.153              | 0.427           | 0.000                   | 0.012        | 0.221        | 0.476            | 0.000          | 0.372              | 0.004              |
| <b>Thickness of the inner muscle layer (µm)</b> | 0.194         | 0.000       | 0.077      | 0.131               | 0.000              | 0.000           | 0.000                   | 0.007        | 1.000        | 0.000            | 0.007          | 0.011              | 0.000              |
| <b>Thickness of the outer muscle layer (µm)</b> | 0.011         | 0.001       | 0.844      | 0.010               | 0.698              | 0.000           | 0.891                   | 0.659        | 0.050        | 0.715            | 0.001          | 1.000              | 0.002              |
| <b>Total thickness of muscularis (µm)</b>       | 0.003         | 0.000       | 0.193      | 0.001               | 0.075              | 0.000           | 0.075                   | 0.045        | 0.430        | 0.005            | 0.000          | 0.901              | 0.000              |
| <b>Muscle to mucosa ratio</b>                   | 0.040         | 0.016       | 0.012      | 0.014               | 0.198              | 0.000           | 0.888                   | 0.147        | 0.768        | 0.729            | 0.011          | 0.699              | 0.187              |
| <b>Submucosa to mucosa ratio</b>                | 0.000         | 0.000       | 0.066      | 0.001               | 0.639              | 0.697           | 0.001                   | 0.016        | 0.820        | 0.530            | 0.001          | 0.000              | 0.963              |
| <b>Total number of crypts/mm</b>                | 0.082         | 0.004       | 0.279      | 0.467               | 0.583              | 0.833           | 0.000                   | 0.777        | 0.295        | 0.002            | 0.852          | 0.040              | 0.250              |
| <b>Number of open crypts/mm</b>                 | 0.000         | 0.000       | 0.011      | 0.129               | 0.006              | 0.044           | 0.563                   | 0.009        | 0.000        | 0.012            | 0.150          | 1.000              | 0.123              |

|                                           |       |       |       |       |       |       |       |       |       |       |       |       |       |
|-------------------------------------------|-------|-------|-------|-------|-------|-------|-------|-------|-------|-------|-------|-------|-------|
| <b>Number of closed crypts/mm</b>         | 0.811 | 0.002 | 0.965 | 0.589 | 0.162 | 0.049 | 0.000 | 0.165 | 0.297 | 0.561 | 0.990 | 0.004 | 0.012 |
| <b>Number of undamaged villi/mm</b>       | 0.570 | 0.870 | 0.662 | 0.757 | 0.554 | 0.666 | 0.010 | 1.000 | 0.901 | 0.998 | 0.870 | 0.994 | 0.959 |
| <b>Number of damaged villi/mm</b>         | 0.000 | 0.000 | 0.000 | 0.013 | 0.000 | 0.000 | 0.000 | 0.000 | 0.000 | 0.014 | 0.047 | 0.001 | 0.701 |
| <b>Total number of villi/mm</b>           | 0.000 | 0.005 | 0.020 | 0.283 | 0.013 | 0.000 | 0.000 | 0.003 | 0.043 | 0.430 | 0.848 | 0.216 | 0.681 |
| <b>Number of crypts to villi/mm ratio</b> | 0.000 | 0.000 | 0.001 | 0.211 | 0.005 | 0.008 | 0.002 | 0.002 | 0.000 | 0.000 | 0.907 | 0.307 | 0.716 |
| <b>Number of enterocytes/mm</b>           | 0.028 | 0.004 | 0.353 | 0.003 | 0.000 | 0.000 | 0.000 | 0.533 | 0.120 | 0.653 | 0.002 | 0.059 | 0.718 |
| <b>Number of Goblet cells/mm</b>          | 0.260 | 0.001 | 0.689 | 0.240 | 0.553 | 0.012 | 0.006 | 0.003 | 1.000 | 0.130 | 0.002 | 0.555 | 0.116 |
| <b>Enterocytes to Goblet cells ratio</b>  | 0.006 | 0.008 | 0.358 | 0.028 | 0.000 | 0.188 | 0.000 | 0.004 | 0.712 | 0.280 | 0.088 | 0.365 | 0.888 |
| <b>The height of enterocytes (μm)</b>     | 0.339 | 0.056 | 0.042 | 0.000 | 0.200 | 0.443 | 0.001 | 0.974 | 0.610 | 0.049 | 0.855 | 0.138 | 0.531 |
| <b>Villi height (μm)</b>                  | 0.540 | 0.000 | 0.000 | 0.000 | 0.373 | 0.249 | 0.022 | 0.000 | 0.000 | 0.442 | 0.998 | 0.000 | 0.000 |
| <b>Villi width (μm)</b>                   | 0.000 | 0.000 | 0.000 | 0.010 | 0.002 | 0.000 | 0.000 | 0.007 | 0.000 | 0.251 | 0.393 | 0.513 | 0.017 |
| <b>Crypts width (μm)</b>                  | 0.546 | 0.000 | 0.005 | 0.000 | 0.043 | 0.003 | 0.000 | 0.008 | 0.728 | 0.014 | 0.000 | 0.000 | 0.199 |

|                                                            |       |       |       |       |       |       |       |       |       |       |       |       |       |
|------------------------------------------------------------|-------|-------|-------|-------|-------|-------|-------|-------|-------|-------|-------|-------|-------|
| <b>Crypts depth<br/>(<math>\mu\text{m}</math>)</b>         | 0.000 | 0.000 | 0.652 | 0.000 | 0.954 | 0.000 | 0.000 | 0.148 | 0.067 | 0.306 | 0.000 | 0.981 | 0.000 |
| <b>Villus/crypt<br/>ratio</b>                              | 0.000 | 0.001 | 0.035 | 0.000 | 0.848 | 0.000 | 0.000 | 0.014 | 0.998 | 0.775 | 0.023 | 0.000 | 0.676 |
| <b>Absorption<br/>surface (<math>\mu\text{m}^2</math>)</b> | 0.760 | 0.000 | 0.000 | 0.000 | 0.309 | 0.007 | 0.000 | 0.002 | 0.000 | 0.003 | 0.174 | 0.999 | 0.133 |

---

C, control group; HMB,  $\beta$ -Hydroxy- $\beta$ -methylbutyrate at a daily dose of 0.02 g/kg of body weight; AKG, alpha-ketoglutaric acid at a daily dose of 0.4 g/kg of body weight; N = 12 in each group; significance level at  $\alpha < 0.05$

Table S3. The effect of the main factors (type of mother – primiparous or multiparous), diet/treatment and offspring sex) and their interactions on histomorphometric parameters of the ileum of male and female offspring born from primiparous and multiparous dams supplemented with HMB and/or AKG during the gestational period.

| <b>P value for factors and interactions</b>     | <b>Mother</b> | <b>Diet</b> | <b>Sex</b> | <b>Mother *Diet</b> | <b>Mother *Sex</b> | <b>Diet*Sex</b> | <b>Mother *Diet*Sex</b> | <b>C*HMB</b> | <b>C*AKG</b> | <b>C*HMB+AKG</b> | <b>HMB*AKG</b> | <b>HMB*HMB+AKG</b> | <b>AKG*HMB+AKG</b> |
|-------------------------------------------------|---------------|-------------|------------|---------------------|--------------------|-----------------|-------------------------|--------------|--------------|------------------|----------------|--------------------|--------------------|
| <b>Thickness of the mucosa (µm)</b>             | 0.046         | 0.000       | 0.880      | 0.003               | 0.345              | 0.280           | 0.136                   | 0.000        | 0.000        | 0.001            | 0.612          | 0.246              | 0.921              |
| <b>Thickness of the submucosa (µm)</b>          | 0.000         | 0.000       | 0.058      | 0.002               | 0.651              | 0.029           | 0.006                   | 0.000        | 0.310        | 0.002            | 0.051          | 0.909              | 0.231              |
| <b>Thickness of the inner muscle layer (µm)</b> | 0.001         | 0.000       | 0.516      | 0.038               | 0.000              | 0.000           | 0.036                   | 0.040        | 0.019        | 0.496            | 0.000          | 0.000              | 0.439              |
| <b>Thickness of the outer muscle layer (µm)</b> | 0.044         | 0.000       | 0.879      | 0.000               | 0.067              | 0.002           | 0.042                   | 0.001        | 0.994        | 0.952            | 0.000          | 0.006              | 0.862              |
| <b>Total thickness of muscularis (µm)</b>       | 0.001         | 0.000       | 0.887      | 0.000               | 0.006              | 0.000           | 0.319                   | 0.000        | 0.925        | 1.000            | 0.000          | 0.001              | 0.907              |
| <b>Muscle to mucosa ratio</b>                   | 0.000         | 0.002       | 0.622      | 0.012               | 0.046              | 0.000           | 0.012                   | 0.957        | 0.004        | 0.063            | 0.020          | 0.199              | 0.789              |
| <b>Submucosa to mucosa ratio</b>                | 0.000         | 0.000       | 0.491      | 0.000               | 0.275              | 0.001           | 0.001                   | 0.000        | 0.005        | 0.000            | 0.012          | 0.841              | 0.116              |
| <b>Total number of crypts/mm</b>                | 0.000         | 0.000       | 0.963      | 0.251               | 0.443              | 0.412           | 0.020                   | 0.000        | 0.001        | 0.019            | 0.732          | 0.176              | 0.747              |
| <b>Number of open crypts/mm</b>                 | 0.000         | 0.000       | 0.186      | 0.000               | 0.003              | 0.057           | 0.000                   | 0.000        | 0.021        | 0.000            | 0.049          | 0.883              | 0.254              |

|                                           |       |       |       |       |       |       |       |       |       |       |       |       |       |
|-------------------------------------------|-------|-------|-------|-------|-------|-------|-------|-------|-------|-------|-------|-------|-------|
| <b>Number of closed crypts/mm</b>         | 0.457 | 0.022 | 0.060 | 0.000 | 0.012 | 0.215 | 0.013 | 0.828 | 0.980 | 0.059 | 0.599 | 0.351 | 0.020 |
| <b>Number of undamaged villi/mm</b>       | 0.001 | 0.000 | 0.827 | 0.017 | 0.002 | 0.006 | 0.001 | 0.000 | 0.010 | 0.000 | 0.070 | 0.453 | 0.769 |
| <b>Number of damaged villi/mm</b>         | 0.000 | 0.000 | 0.863 | 0.000 | 0.006 | 0.001 | 0.157 | 0.000 | 0.000 | 0.000 | 0.000 | 0.014 | 0.283 |
| <b>Total number of villi/mm</b>           | 0.000 | 0.000 | 0.803 | 0.000 | 0.000 | 0.260 | 0.002 | 0.000 | 0.000 | 0.000 | 0.002 | 0.085 | 0.569 |
| <b>Number of crypts to villi/mm ratio</b> | 0.000 | 0.000 | 0.121 | 0.002 | 0.000 | 0.197 | 0.143 | 0.000 | 0.464 | 0.000 | 0.000 | 0.082 | 0.025 |
| <b>Number of enterocytes/mm</b>           | 0.029 | 0.000 | 0.564 | 0.000 | 0.000 | 0.005 | 0.000 | 0.014 | 0.709 | 0.000 | 0.000 | 0.288 | 0.000 |
| <b>Number of Goblet cells/mm</b>          | 0.417 | 0.000 | 0.859 | 0.017 | 0.073 | 0.000 | 0.223 | 0.002 | 0.010 | 0.562 | 0.949 | 0.000 | 0.000 |
| <b>Enterocytes to Goblet cells ratio</b>  | 0.000 | 0.003 | 0.138 | 0.004 | 0.000 | 0.000 | 0.000 | 0.001 | 0.585 | 0.421 | 0.067 | 0.125 | 0.994 |
| <b>The height of enterocytes (µm)</b>     | 0.166 | 0.722 | 0.501 | 0.017 | 0.123 | 0.108 | 0.027 | 0.868 | 0.841 | 1.000 | 1.000 | 0.854 | 0.826 |
| <b>Villi height (µm)</b>                  | 0.007 | 0.000 | 0.558 | 0.531 | 0.114 | 0.000 | 0.004 | 0.266 | 0.000 | 0.032 | 0.040 | 0.795 | 0.305 |
| <b>Villi width (µm)</b>                   | 0.302 | 0.008 | 0.186 | 0.000 | 0.119 | 0.000 | 0.000 | 0.534 | 0.869 | 0.068 | 0.149 | 0.688 | 0.007 |



|                                                            |       |       |       |       |       |       |       |       |       |       |       |       |       |
|------------------------------------------------------------|-------|-------|-------|-------|-------|-------|-------|-------|-------|-------|-------|-------|-------|
| <b>Crypts width<br/>(<math>\mu\text{m}</math>)</b>         | 0.000 | 0.000 | 0.049 | 0.034 | 0.000 | 0.001 | 0.003 | 0.000 | 0.861 | 0.910 | 0.002 | 0.000 | 0.468 |
| <b>Crypts depth<br/>(<math>\mu\text{m}</math>)</b>         | 0.000 | 0.000 | 0.001 | 0.000 | 0.000 | 0.000 | 0.000 | 0.000 | 0.054 | 0.000 | 0.000 | 0.088 | 0.000 |
| <b>Villus/crypt<br/>ratio</b>                              | 0.000 | 0.000 | 0.118 | 0.000 | 0.001 | 0.017 | 0.109 | 0.000 | 0.023 | 0.000 | 0.000 | 0.990 | 0.001 |
| <b>Absorption<br/>surface [<math>\mu\text{m}^2</math>]</b> | 0.428 | 0.000 | 0.611 | 0.070 | 0.506 | 0.000 | 0.030 | 0.996 | 0.000 | 0.020 | 0.001 | 0.038 | 0.628 |

---

C, control group; HMB,  $\beta$ -Hydroxy- $\beta$ -methylbutyrate at a daily dose of 0.02 g/kg of body weight; AKG, alpha-ketoglutaric acid at a daily dose of 0.4 g/kg of body weight; N = 12 in each group; significance level at  $\alpha < 0.05$



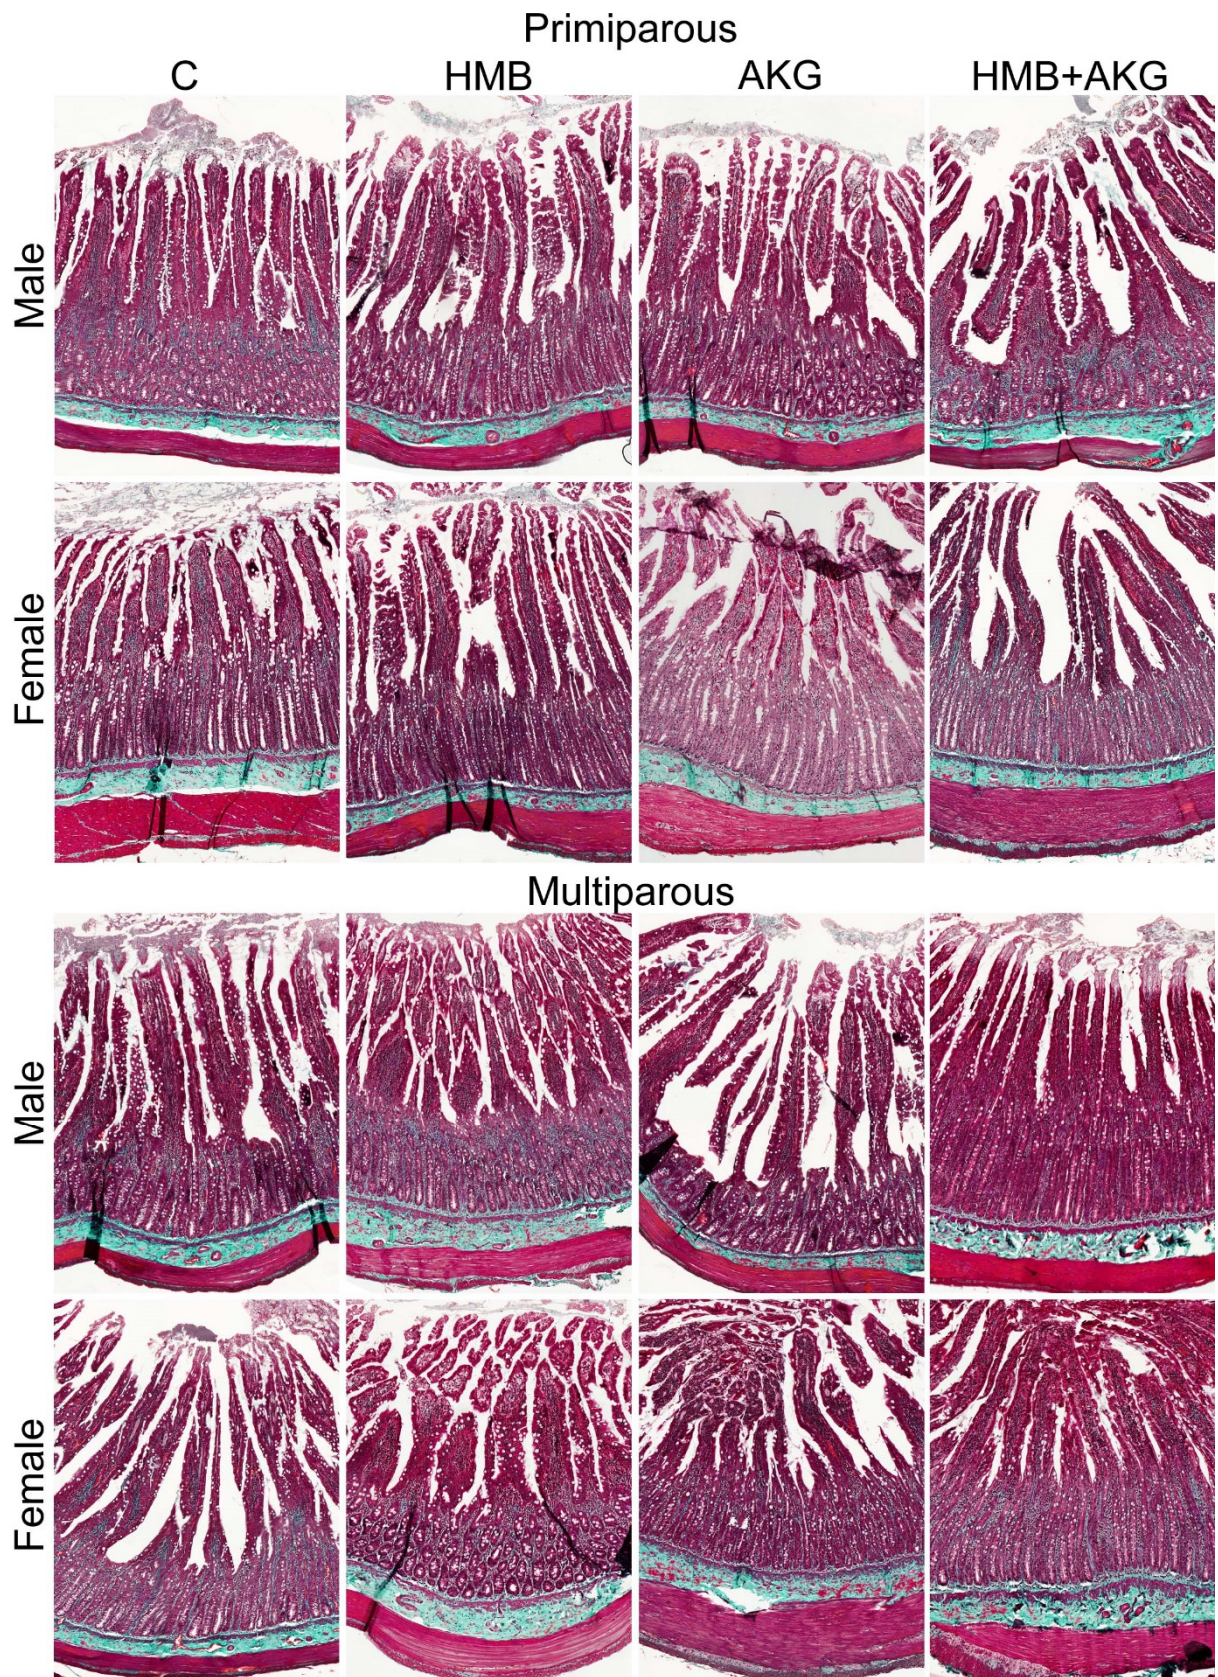

Figure 1S. A summary of Goldners trichrome staining images representative for jejunum. C, control group; HMB,  $\beta$ -Hydroxy- $\beta$ -methylbutyrate at a daily dose of 0.02 g/kg of body weight; AKG, alpha-ketoglutaric acid at a daily dose of 0.4 g/kg of body weight; N = 12 in each group. Magnification x100.
